1 **Modelling bacteria-phage interactions driving predation and horizontal gene**  
2 **transfer**

3 Jorge A. Moura de Sousa<sup>1,2,\*</sup>, Ahlam Alsaadi<sup>3</sup>, Jakob Haaber<sup>3</sup>, Hanne Ingmer<sup>3</sup>, Eduardo P.C.  
4 Rocha<sup>1,2</sup>

5 <sup>1</sup>Microbial Evolutionary Genomics, Institut Pasteur, 28, rue Dr Roux, Paris, 75015, France.

6 <sup>2</sup>CNRS, UMR3525, 28, rue Dr Roux, Paris, 75015, France.

7 <sup>3</sup>Department of Veterinary and Animal Sciences, University of Copenhagen, Frederiksberg, Denmark

8 \* corresponding author: [jorge-andre.sousa@pasteur.fr](mailto:jorge-andre.sousa@pasteur.fr)

9

10

11 Keywords: individual based modelling; bacteria; phage; predation; horizontal gene transfer.

12

13

## 14 ABSTRACT

15 Bacteriophages shape microbial communities by predateding on them and by accelerating their  
16 adaptation through horizontal gene transfer. The former is the basis of phage therapy, whereas  
17 the latter drives the evolution of numerous bacterial pathogens. We present a novel computational  
18 approach (eVIVALDI – eco-**e**Volutionary mIcrobial indiVidu**AL**-base**D** sImulations) to study  
19 bacteria-phage ecological interactions that integrates a large number of processes, including  
20 population dynamics, environmental structure, genome evolution, and phage-mediated horizontal  
21 transfer. We validate and illustrate the relevance of the model by focusing on three specific  
22 questions: the ecological interactions between bacteria and virulent phage in the context of phage  
23 and antibiotic therapy, the role of prophages as competitive weapons, and autotransduction  
24 leading to bacterial acquisition of antibiotic resistance genes upon lysis of resistant competitors.  
25 Our model recapitulates experimental and theoretical observations and provides novel insights. In  
26 particular, we find that environmental structure has a strong effect on community dynamics and  
27 evolutionary outcomes in all three case studies. Strong environmental structure, especially if  
28 antibiotics are heterogeneously distributed, promotes the acquisition of resistance to both phages  
29 and antibiotics, creates variation in the dynamics of arm-races between bacteria and phage, and  
30 better predicts dynamics of lysogen invasion in the gastrointestinal tract, compared to models  
31 assuming well-mixed environments. Moreover, we predict a parameter space where co-existence  
32 between invaders and resident lysogens can occur during autotransduction, which we then  
33 confirm experimentally. By linking ecological and evolutionary dynamics, our modelling approach  
34 sheds light on the factors that influence the dynamics of bacteria-phage interactions. It can also  
35 be expanded to put forward novel hypotheses, facilitating the design of phage therapy treatments  
36 and the assessment of the role of phages in the spread of antibiotic resistance.

## 37 Introduction

38 Microbial organisms are pervasive across all natural environments, including the human body.  
39 Their adaptation and organization in communities may lead to disease [1], drive host evolution [2],  
40 and produce major changes in ecosystems [3,4]. Ecological interactions in microbial communities  
41 influence, and are influenced by, the rapid pace with which microbes acquire adaptive changes  
42 [5,6]. A striking example is the relationship between bacteria and bacteriophages (from here on  
43 referred to as phages), because the latter predate on the former whilst also driving their adaptation  
44 [4]. Phages are the most abundant entities in nature [7,8] and very efficient bacterial predators; it  
45 has been estimated that they promote the turnover of ~20% of bacterial mass every single day in  
46 certain environments [9,10]. In the context of widespread antibiotic resistance, this has led to a  
47 rekindled interest in phage therapy as an adjuvant or a replacement of antibiotic therapy against  
48 multi-resistant bacteria [11].

49 Virulent phages follow a strictly lytic cycle within their hosts, but they often exist in diverse  
50 communities with other virulent and temperate phages. Infection by the latter can lead to either  
51 the lytic cycle or their integration in bacterial genomes, as prophages (lysogenic cycle). Temperate  
52 phages are not used for phage therapy because lysogeny prevents them from extinguishing  
53 bacterial populations and drives the latter's resistance to closely, and sometimes distantly related  
54 phages – a mechanisms called superinfection exclusion [12-14]. However, half of the bacterial  
55 genomes contain at least one, and up to 20, prophages, and these are more frequent in bacterial  
56 pathogens [15], which means that they cannot be ignored in phage therapy. The expression of  
57 prophage genes may provide novel phenotypes to the host (lysogenic conversion), and many  
58 cases have been described where prophages carry adaptive traits implicated in virulence or  
59 resistance to stress [16]. Virions arising from prophage induction can infect closely related  
60 competitor bacteria that are non-lysogenic for the phage, decreasing bacterial competition,

61 increasing prophage frequency, and liberating resources that can be used for the growth of the  
62 remaining lysogenic population [17]. In this case, prophages have been regarded as weapons  
63 against bacterial competitors [13,18].

64 Phages can drive horizontal gene transfer between bacteria by transduction [19]. This can be a  
65 hazard in the case of phage therapy if the transferred traits are virulence factors or antibiotic  
66 resistance genes. Specialized transduction occurs in temperate phages when erroneous prophage  
67 excision leads to the transfer of neighboring chromosomal genes. Generalized transduction  
68 occurs when bacterial DNA is delivered to other cells after being mistakenly encapsulated in  
69 virions, due to the specificities of the *pac* DNA packaging system [20]. Although these mechanisms  
70 are commonly used as genetic engineering tools [21], their rates in nature are poorly known. In  
71 the lab, they vary across several orders of magnitude (between  $10^{-11}$  and  $10^{-3}$  [22,23]), depending  
72 on the phage, the environment, and the type of culture media [19]. Importantly, phage driven  
73 transmission of bacterial DNA can have particularly nefarious consequences for humans.  
74 Transducing phages are responsible for the transmission of virulence factors in *Staphylococcus*  
75 *aureus* [24], and may accelerate the spread of antibiotic resistance genes [25,26]. Transduction  
76 can also have an impact at very short time scales: prophage induction facilitates the capture of  
77 adaptive traits (e.g., an antibiotic resistance gene) from a second bacterial strain that is infected  
78 by the phage and, through generalized transduction, transfers the gene to the lysogenic strain.  
79 This process has been called autotransduction [27]. Hence, phages drive the evolution of bacterial  
80 gene repertoires and may spread virulence or antibiotic resistance factors during phage therapy.

81 The diversity of interactions between phages and bacteria may obscure the effects of each of  
82 them. Experimental approaches have described and clarified the mechanisms underlying these

83 interactions, but usually focused on simplified environments [8,28]. *In vivo* studies of these  
84 interactions (e.g., in mammalian hosts [29]) tackle more natural environments, but have limited  
85 resolution in tracking temporal dynamics or the effects of individual mechanisms. Mathematical  
86 modelling provides a complementary approach to the study of phage-bacteria interactions,  
87 providing important insights on their co-evolutionary processes [30] or the dynamics of particular  
88 bacterial defense mechanisms [31,32]. Previous models have focused on individual mechanisms  
89 of interaction in simple environments (e.g., how the evolution of resistance to phage can affect  
90 clinical treatments [33]), because tackling multiple mechanisms and spatial heterogeneity hinders  
91 the development of analytical solutions. Yet, natural communities, and particularly those relevant  
92 for phage therapy, include complex interactions and spatial structure [34-37]. This may explain  
93 why models sometimes fail to fully reproduce *in vivo* dynamics of phage infection [28], and why  
94 there is paucity of models on the impact of phage-mediated horizontal gene transfer in the  
95 adaptation of bacterial communities (but see the work of Volkova et al [38] for a theoretical  
96 comparison between the relative efficacy of transduction versus conjugation in transmitting an  
97 adaptive trait).

98 Individual-based models (IBMs) are an alternative to population-based mathematical approaches  
99 for studying complex microbial systems [39], and they have been useful to understand, for  
100 instance, the interactions between bacteria and phages in biofilms [36]. Although computationally  
101 intensive, IBMs provide a framework to study biological systems through the incorporation of  
102 different (and potentially interacting) mechanisms at the level of the individual. Population-level  
103 dynamics can then emerge from the collective individual behaviors. This makes IBMs particularly  
104 appealing to investigate bacteria-phage interactions, because these involve both ecological (e.g.,  
105 predation) and evolutionary (e.g., transduction of adaptive traits) scales, with antagonistic

106 mechanisms defined at the individual level (e.g., the lysis-lysogeny decision of temperate phage).  
107 To study these multiple roles of phages in microbial communities, we developed an IBM approach  
108 that is able to simulate diverse mechanisms and eco-evolutionary contexts: eVIVALDI – eco-  
109 **e**Volutionary mIcrobial indiVidu**AL**-base**D** simulations. We focus on three questions, of gradually  
110 increasing complexity, that are relevant for bacterial evolution and phage therapy, and that cover  
111 a good range of possible eco-evolutionary interactions between bacteria and phage. First, we  
112 introduce the basic scheme of the simulation with the study of ecological interactions between co-  
113 evolving virulent phages and bacteria under phage and antibiotic pressure in structured  
114 environments. Then we introduce lysogeny and super-infection exclusion in the model to study  
115 the role of prophages as competitive weapons. We show that our model provides better fit to  
116 previous experimental results than earlier models. Finally, we introduce transduction and the way  
117 we encode individual genomes in the model to elucidate how bacteria may obtain novel adaptive  
118 genes from sensitive bacteria by autotransduction. We use eVIVALDI to explore and quantify the  
119 different mechanisms of phage-bacteria interactions and to gain insights on how the structure of  
120 the environment can affect these interactions and the community dynamics. We tackle each  
121 question by demonstrating the ability of the model to capture previous results and then show how  
122 its complexity highlights new relevant features.

## 123 Methods

### 124 Concept and basic implementation

125 The eVIVALDI model was developed in Python (version 2.7.3), using an object-oriented approach,  
126 with a focus on the flexibility and extensibility of mechanisms and parameters simulated. The  
127 complete ODD (Overview, Design concepts, and Details) protocol [40] of the developed model is  
128 available as supplementary text (Text S1), but below is a brief overview of the model. The source  
129 of the software can be obtained from the authors. The simulations can be run on a typical desktop  
130 computer. In a 3GHz 8-core Mac Pro, with 32GB of RAM, a replicate of a simulation (100  
131 iterations), takes from ~5 to 30 minutes, depending on the parameters. Computations can also be  
132 performed in a cluster, allowing the parallel simulation of multiple parameters.

### 133 Entities and their ecological setup

134 Both bacterial cells and phage particles are represented as independent individuals on an  
135 environment represented as a two-dimensional grid with Moore neighbourhood (the 8 connected  
136 grid spaces of each location, for a Moore distance of one) (Fig 1A). Bacteria can be of different  
137 species. Each individual bacterium has a genome with core, accessory and, eventually, prophage  
138 genes. Bacteria have individual phenotypes, such as growth rate or the ability to survive antibiotic  
139 exposure. Phages can be from different species, have different lifestyles (temperate, virulent or  
140 defective), and possess individual phenotypes (e.g., attachment receptors and burst sizes). The  
141 host range of phage hosts is defined by a matrix (Fig 1B), and the superinfection exclusion rules  
142 amongst phages is defined in a similar way (Fig 1C).

### 143 Environmental and bacterial updates

144 The environment and the individuals are updated and behave according to biologically inspired  
145 rules. The environment can be completely structured, semi-structured or not structured at all (i.e.,

146 well-mixed), and it can be set as bounded or have a toroidal space. The type of structure influences  
147 the diffusion of the different bacterial cells and environmental particles (phage and antibiotics).  
148 Each location can hold a single bacterial cell and several phage cells. Free space is the bacterial  
149 resource to be consumed, and it is freed whenever bacteria die. Bacterial death can be  
150 intrinsic (e.g., of old age) or explicit (e.g., exposure to antibiotics or predation by phage) (Fig 1D).  
151 When a free space is available, the neighboring bacteria compete for reproduction. The outcome  
152 of the competition is chosen through a roulette wheel method that accounts for the fitness of each  
153 bacterium. The successful bacterium generates an offspring into the free space (Fig 1E). Bacteria  
154 can be infected by phage in the environment. The outcome of the infection depends on the phage  
155 lifestyle and, for temperate phage, the lysis-lysogeny decision. This decision is stochastic but  
156 influenced by the number of surrounding phages. For temperate phage, integration in the host  
157 genome means vertical inheritance with host replication, until the phage excises from the genome,  
158 according to a probability that can be low but non-null throughout the simulation (stochastic  
159 prophage induction) and that can also be influenced by the level of antibiotic stress to which the  
160 host is exposed. Phage can transduce bacterial genes to other bacteria by generalized or  
161 specialized transduction (depending on phages' characteristics, Fig 1F).

## 162 [Input, output and documentation of the model](#)

163 The inputs of each simulation are two text files that define the general parameters and also the  
164 ecological setup of the environment (types and numbers of bacteria and/or phage, along with their  
165 attributes). The statistics collected at different time points are stored in dictionaries and dataframes  
166 (using *pandas*), can be tailored to the experimenter's choice and can be represented visually  
167 (using *matplotlib* and *seaborn*) or created as an output file.

## 168 [Random Forest Analysis](#)

169 The Random Forest Analysis is based on simulations performed with the model, covering 3000



170 random combinations of parameters, with 30 simulated repeats per combination. The output of  
171 this cohort of simulations is grouped and resumed in response variables, to which a column with  
172 3000 rows of a random parameter is added (i.e., a choice of a number between 1 and 3). This  
173 table is used as input of the `randomForest` package in R (version 4.6.12), where the *randomForest*  
174 function is run with the parameters `ntrees` set to 10000. The relative importance of each parameter  
175 (the percentage increase in minimum squared error, %IncMSE) is assessed using the *importance*  
176 function from the same package.

177

178 **FIG 1. Mechanisms and workflow of the eVIVALDI model.** A) Bacterial cells and bacteriophage particles are modelled in a 2-  
179 dimensional space, where each (x,y) location holds at most a single bacterial cell and at most a predefined maximum number of  
180 phages. The environment ranges from completely well-mixed (liquid), where the contents of each location are randomized at each  
181 iteration, to spatially structured, where they are fixed. An intermediate structure is achieved by allowing replication of bacterial cells  
182 into a neighbourhood of a given distance. Bacteria and phage can be of different species, and the latter exist as entities either in the  
183 environment, where they can infect new hosts, or within hosts, where they either replicate or integrate into their genomes. B) Phage  
184 host range is defined in a matrix where each phage has a probability of infecting a given bacterial species. C) Superinfection exclusion  
185 is the probability that infection by a given phage aborts when a given type of prophage is present. D) The basal probability of bacterial  
186 death can increase by antibiotic exposure or phage infection. Phages decay in function of the period of time spent outside a bacterial  
187 host. E) Bacteria compete to reproduce to empty locations, with the fittest bacteria being more likely to produce an offspring. The  
188 offspring inherits the traits of the parent cell, but can undergo mutations and is placed into the free location. F) The type of phage  
189 infection is determined by the lifestyle of the phage, with virulent following an obligatory lytic cycle, whilst temperate phage can  
190 undertake the lytic or the lysogenic cycle following a stochastic decision affected by the density of phages in the environment. The  
191 probability of specialized transduction is computed during excision, leading eventually to the incorporation into the phage DNA of a  
192 neighboring gene. Generalized transduction occurs before the burst, and a virion has the probability to incorporate random genes from  
193 its host, instead of its own DNA. Transduced genes can be used by the subsequently infected bacterial hosts. G) The main cycle of a  
194 typical simulation within the model. See complete ODD in Supplementary Material.

## 195 Results and Discussion

### 196 Ecology of phage-bacteria interactions in the light of antibiotic and phage therapy

197 Antimicrobial therapies rely on the effectiveness of selective agents to kill sensitive bacteria.  
198 Phage therapy involves infection and reproduction of the killing agents, thus extending the ability  
199 of standard chemical therapies. We started by investigating if eVIVALDI could reproduce simplified  
200 but typical ecological scenarios where sensitive individuals are killed by antibiotics and/or predated  
201 by virulent phages, thus promoting the increase in frequency of resistant bacteria. A simple  
202 community of two bacterial species, one sensitive and another resistant (either to antibiotic or  
203 virulent phage), was simulated in a well-mixed environment, and no new resistant bacterial  
204 mutants are allowed to emerge in these simulations. Resistance can be defined as costly, in line  
205 with experimental data [41], rendering resistant bacteria less competitive in the absence of  
206 selection pressure (Fig S1). However, when either antibiotics (Fig 2A) or phage (Fig 2B) are  
207 introduced in the environment, the resistant population rapidly increases to fixation. Predation by  
208 phage leads to an initial increase in their numbers, because of the abundance of sensitive bacteria,  
209 but also to their subsequent rapid extinction when sensitive hosts become unavailable (Fig 2B). A  
210 combined treatment of antibiotics and virulent phages leads to the extinction of both populations  
211 because none has the ability to survive both selective pressures (Fig 2C). However, the decrease  
212 of the antibiotic sensitive population is slower in the presence of phages because of lower  
213 competition from antibiotic resistant cells, which are killed by the phage (Fig S2A).

214 Our model allows to test explicitly the effect of spatial structure on community composition.  
215 Antibiotics applied homogeneously in spatially structured communities delay the extinction of the  
216 sensitive bacteria in comparison to non-structured environments (Fig S2B). However, antibiotics  
217 are more likely to be applied non-homogeneously when environments are structured. The delayed  
218 extinction is more pronounced in these conditions leading to long term coexistence between

219 sensitive and resistance bacteria (Fig S3). The effect of phage predation on community dynamics  
220 is markedly different between well-mixed and spatially structured environments because the latter  
221 decreases dispersion leading to “predation waves” that produce spatial arrangements of dead  
222 cells akin to those observed in phage plaque assays (see Fig S4 and Video S1). Ultimately, spatial  
223 structure results in delayed extinction of phage sensitive cells (Fig 2E vs Fig 2B). Similar to well-  
224 mixed environments, presence of antibiotics and phage in spatially structured environments leads  
225 to a much slower extinction of antibiotic resistant bacteria compared to environments with  
226 antibiotics but lacking phages (Fig 2F vs Fig 2D). However, the presence of phages and antibiotics  
227 in spatially structured environments leads to a faster extinction of antibiotic sensitive populations,  
228 compared to well mixed environments (Fig 2F vs Fig 2C, Fig S2C), due to a much less efficient  
229 phage predation of their competitors when the environment is structured.

230

231 **Fig 2. Community dynamics driven by antibiotic selection and phage predation.** A small community composed of two different  
232 species is subjected to different selective pressures. Bacteria can be sensitive to antibiotics but resistant to phage (in green), or  
233 resistant to antibiotics but sensitive to phage (in red). We follow the temporal dynamics and show the populations in their respective  
234 colors (the number of free phage in the environment is shown in black). Solid lines indicate mean values for 30 simulations ran with  
235 the same parameters and shaded areas show their 95% confidence interval. At the right of each plot is a representative time lapse at  
236 3 time points of the lattices for each scenario, where the colors represent each bacterial species and white spaces represent the  
237 absence of bacterial cells. In A) and D) antibiotics are applied at the indicated time. In B) and E), virulent phages (10 individual particles)  
238 are co-inoculated with the bacteria at time 0. In C) and F), both selective regimes are applied, with antibiotics applied at the indicated  
239 time and virulent phage co-inoculated with bacteria at time 0. In A), B) and C), the environment is homogeneous (well-mixed), as in  
240 liquid culture. In D), E) and F), the environment is spatially structured. In D) and F) antibiotics are applied homogenously in the  
241 structured environment, and in E) and F) each of the 10 phage particles is initially placed randomly in the biofilm. The complete set of  
242 parameters for these simulations is show in supplementary data.

243

244 The introduction of mutations in the model, eventually reversing the sensibility to antibiotics or  
245 phages, tends to stabilize the bacterial populations (Fig S5A-B). Nevertheless, some populations

246 still go extinct because of the loss of rare mutants by genetic drift or because no adaptive  
247 mutations occurred in the time span. For similar mutation rates, cells resistant to antibiotics  
248 increase in frequency faster than the ones resistant to phages, due to differences in the dynamics  
249 of the two selection pressures (Fig S5C). Under pressure of antibiotics and phages, double  
250 resistant cells emerge only when the mutation rate is very high. The impact of the environmental  
251 structure in the dynamics of predation (Fig 2) led us to analyze how it affects the emergence of  
252 resistant lineages (Fig 3). Whilst single resistant mutants increase in frequency slower in  
253 structured environments (Fig S5D), double mutants resistant to antibiotics and phage are much  
254 more likely to emerge (Fig 3A-D) for intermediate rates of mutation (Fig 3E). This is because in  
255 structured environments, the rare mutants resistant to antibiotics benefit from the resources  
256 available from neighboring dead cells and rise in frequency without contact with phages (that  
257 diffuse less efficiently). This increases the span of time available for the acquisition of secondary  
258 mutations conferring resistance to phages, especially if the initial number of phages is not very  
259 high (Fig S6). Hence, the acquisition of multiple adaptive mutations is more likely to occur in  
260 structured environments.

261

262 **Fig 3. Spatial structure promotes the emergence of multi-resistant bacteria.** A-D) Simulations of a single bacterial species, initially  
263 sensitive to antibiotics and phage. Lines show 30 replicate simulations with emerging resistant lineages (to one or both selective  
264 pressures). Single mutants resistant to phage are shown in red, whilst single mutants resistant to bacteria are shown in green. Double  
265 mutant lineages resistant to antibiotics and phage are shown in grey. In A) and B) mutants emerge at a rate of  $10^{-4}$ . C and D) mutants  
266 emerge at a rate of  $10^{-3}$ . A and C show dynamics from well-mixed environments. B and D show dynamics from spatially structured  
267 environments. E) Percentage of simulations (out of 30) where lineages resistant both to antibiotics and phage have emerged, in either  
268 well mixed or spatially structured environments, for all the mutation rates tested (x-axis).

269

270 The ability of bacteria to evolve resistance to phage might be futile if phage can also adapt to

271 overcome the changes in their bacterial hosts [42]. When we allowed bacteria *and* phage to evolve  
272 in our simulations (Fig S7A), we observed co-evolutionary arms races similar to both theoretical  
273 expectations [33] and experimental observations [43]. Spatially structured environments showed  
274 slower co-evolution dynamics and higher variability between simulations than well-mixed ones  
275 (Fig S7B). Heterogeneous antibiotics added in structured environments further delayed the co-  
276 evolution dynamics (Fig S7C-D), due to the death of a significant part of the bacterial population.  
277 Importantly, and as before (Fig 3), surviving bacteria (either resistant to antibiotics or not exposed  
278 to lethal concentrations) were able to generate mutants resistant to phages for a longer period of  
279 time. This is not only due to the limited diffusion of phage, but also because phages need bacterial  
280 hosts to replicate and to generate their own genetic diversity. Thus, a reduction in the number of  
281 bacterial hosts due to antibiotic exposure hinders both phage propagation and evolution. This  
282 suggests that, in natural environments, multiple stressors might render co-evolutionary arms races  
283 less predictable than proposed by theoretical models and experimental settings that assume  
284 homogeneous populations and environments.

### 285 [Lysogeny as a weapon](#)

286 Contrary to virulent phages, temperate phages may integrate the bacterial host genome and  
287 reproduce vertically with it. The lysis-lysogeny decision in our simulations mimics experimental  
288 observations [44], and is influenced by the amount of competition faced by the phage: lysogeny is  
289 more likely under high viral concentrations or high multiplicity of infection (Fig S8). Since lysogens  
290 are protected from further infections by similar phages, due to superinfection exclusion, the  
291 environmental concentration of phages in the simulations decreases rapidly with the increase of  
292 lysogens (and depending on free phage half-life). When lysogeny occurs mostly at high viral  
293 concentration the bacterial population can become extinct before lysogens can arise.  
294 Theoretically, this can also result in the extinction of the phage population.

295 When a lysogen invader arrives at a community with resident bacteria sensitive to its prophage,  
296 lysis of a small fraction of the invaders can dramatically reduce the population of resident sensitive  
297 bacteria. This liberates resources for the lysogenic invaders [13]. eVIVALDI recapitulates previous  
298 experimental data on this prophage-as-a-weapon hypothesis [17] (Fig 4a): prophage induction  
299 rapidly decreases the sensitive population of residents in the early stages of the process, but  
300 lysogenization of the latter rapidly neutralizes this process (because the resident lysogens are  
301 now resistant to the phage). Hence, the use of prophages as a biological weapon can provide a  
302 decisive advantage for colonizing a new niche, but is rapidly neutralized by lysogenization of  
303 competitor bacteria. This is also in agreement with previous theoretical works exploring dynamics  
304 of invasion in well-mixed environments, using prophages as a competitive weapon [45].

305 The advantage of lysogens in the colonization of an environment of resident sensitive bacteria  
306 was recently demonstrated in the mouse gut and was suggested to depend on the initial ratio  
307 between invaders and resident cells [29]. Indeed, our simulations considering different initial ratios  
308 of invading lysogens versus resident non-lysogens showed that the latter were more likely to  
309 survive as lysogens when more abundant in the beginning of the process (Fig S9). The  
310 abovementioned study presented a population-based mathematical model that fitted well most  
311 experimental data, but predicted faster initial infection rates than the observed ones. While  
312 different parameters can slow down these dynamics (e.g., the burst size of the phage [29]), the  
313 spatially structured mouse gastrointestinal tract is likely to interfere with the temporal dynamics of  
314 lysogeny. Interestingly, the inclusion of spatial structure in our model, absent from the  
315 abovementioned models, led to a slower increase of free viral particles and slower generation of  
316 lysogens in the resident strain (Fig 4B-C). This implicates that invading lysogens may be more  
317 successful *in vivo* than would have been predicted by *in vitro* studies in well-mixed environments.

318

319 **Fig 4. The role of lysogeny in community dynamics.** A) Genomes from species A (invaders, grey bars) carry an inducible prophage,  
320 whereas those of species B (residents, white bars) are initially non-lysogens. Species are co-inoculated at a 1:10 mixture. Phages  
321 (black lines) are spontaneously induced from the lysogenic population. These phages infect the sensitive resident population, which  
322 may form lysogens that are protected from phages (B\*, black bars). Eventually, the resident that are not lysogens become extinct. All  
323 bars represent the average of 30 replicate simulations with similar parameters, with the error bars indicating their 95% confidence  
324 interval. Data was displayed as in Figure 1 of [17] for comparison. B) Invading lysogens (L, red lines) and resident sensitive cells (S,  
325 blue lines) are co-inoculated at a ratio of 1:10. Phages (purple lines) are spontaneously induced and generate new lysogens in the  
326 sensitive resident cells (S<sup>L</sup>, green lines). Full lines: well-mixed environments. Dashed lines: spatially structured environment. Data was  
327 displayed as in Figure 3 of [29] for comparison. C) Emergence of resident lysogens in well-mixed (blue) and in spatially structured  
328 (orange) environments during the initial 10 iterations of the simulations shown in B. Shown is the polynomial fit of order 2 for the initial  
329 10 iterations, for each of the two types of environment; ANCOVA between the two environments,  $F=485.5$ ,  $p=0$ .

330

### 331 [Autotransduction of an antibiotic resistance gene](#)

332 When the phages lysing the resident sensitive cells are able to do generalized transduction, they  
333 can transfer adaptive traits back to the invader lysogens (autotransduction [27], Fig 5A). To study  
334 this process, we started by demonstrating the adaptive effect of lysogenic conversion in bacteria  
335 and how it can impact the competition between different phages (Fig S10). We recreated the  
336 conditions for autotransduction within our model, by introducing two strains with similar initial  
337 population sizes: a non-lysogenic strain resistant to antibiotics ("residents") and a strain of  
338 lysogenic antibiotic sensitive "invaders" (Fig 5A). After initial growth, antibiotics are applied in the  
339 environment and, as in the experimental study [27], the invaders survive because they acquire the  
340 resistance gene by generalized transduction (Fig 5A-B). The analysis of the bacterial genomes in  
341 the simulations indicates multiple successive transduction events from the resistant to the invader  
342 cells (Fig 5C). These events are random (i.e., transduction can transfer any part of bacterial DNA),  
343 but natural selection results in over-representation of those transferring antibiotic resistance  
344 genes. Overall, invaders lead residents to extinction in most simulations (62%), but sometimes  
345 residents become lysogens and outcompete invaders (3%). Interestingly, many simulations

346 exhibited coexistence of lysogenic invaders and lysogenic residents (22%, Fig 5D), and a few  
347 showed extinction of all bacterial populations (13%).

348

349 **Fig 5. Simulation of autotransduction.** A) Representation of the autotransduction events. We created a multispecies community akin  
350 to the experimental work of [27], where the invader lysogenic species (red) is sensitive to antibiotics and the resident non-lysogenic  
351 species (green) is resistant to antibiotics but sensitive to the phage of the invaders. B) Temporal dynamics of a typical simulation  
352 leading to the survival of the invaders. The black line indicates the number of phages in the environment and the time of application of  
353 antibiotics is indicated with the grey line. C) Samples of genomes in the population at two different time points of the simulations of  
354 panel B. Before antibiotics ( $t=2$ ), the genomes of the resident population (green) carry the resistance trait (orange marker). The invader  
355 population (red) is not resistant (grey marker indicates sensitivity to drugs). After the application of antibiotic ( $t=10$ ) most of the invaders  
356 have the original prophage and a random sequence of bacterial DNA transduced from the resident cells (other ellipses). D) Outcome  
357 of 100 simulations.

358

359 eVIVALDI includes many complex stochastic mechanisms and it is not straightforward to  
360 empirically disentangle the importance of each in the final outcome. Therefore, we used a machine  
361 learning approach, Random Forest Analysis (RFA, see Methods), to quantify the importance of  
362 the mechanisms driving the increase of the population of invaders (Fig 6A, Table S1). We focused  
363 on the percentage increase in minimum squared error (MSE) associated with each variable in the  
364 simulation. Generalized transduction had the strongest effect in the efficiency of autotransduction  
365 (86% increase in mean square error [MSE], Fig 6B), whilst specialized transduction was almost  
366 negligible (3% increase in MSE). Autotransduction also improved with higher probability of  
367 adsorption (44% increase in MSE) and infection distance (i.e., the maximum distance between a  
368 bacterium and a phage still allowing infection, 70% increase in MSE), because they increase the  
369 reach and efficiency of infection by phage and, subsequently, the likelihood of generalized  
370 transduction (Fig 6C, Fig S11B). In contrast, when the decision to enter lysogeny (49% increase  
371 in MSE) can be made with high probability for relatively low viral concentrations, the resident



372 population proliferates (Fig S11D and Fig S11I for the lysis-lysogeny decision functions explored  
373 with the RFA). The importance of the remaining parameters is detailed in Fig S11.

374

375 **Fig 6. Identification of the main mechanisms affecting the rate of autotransduction of an antibiotic resistance gene using**  
376 **Random Forest Analysis.** A) Analysis is based on 3000 randomized combinations of parameters and 30 repeated simulations for  
377 each combination). Parameters with a higher % in increased minimum square error have a higher importance for the measured  
378 outcome: the median of the final relative frequency of the invader. A random parameter (in grey) was included in the analysis to provide  
379 a baseline reference of importance. B-C) The directionality of the impact of two parameters is assessed by plotting the frequency of  
380 the invader population at the end of the simulation (across all simulations), in function of the parameter of interest (the other parameters  
381 are shown in Fig S11). In the left y-axis, and as strip plot of grey dots, is the distribution of the frequency of the invader population in  
382 all simulations. In the right y-axis, and as red dots and lines, is the median of this frequency across the simulations.

383

384 To better understand the relationship between two of the most important parameters, generalized  
385 transduction and probability of phage attachment, we explored their space of parameters at a  
386 higher resolution than before (Fig 7A), while fixing all other parameters. We found that a critical  
387 combination of high adsorption efficiency and high (but not too high) probability of generalized  
388 transduction is required for the survival of invaders (red region). The survival of the resident  
389 population is the most likely outcome when rates of transduction and/or infection are low, but also  
390 when all phages engage in generalized transduction (100% probability of generalized  
391 transduction), because no viable particles are released in the environment (green region). The  
392 space of parameters leading to coexistence (yellow region) separates the region leading to the  
393 overrepresentation of the invaders from the one leading to the overrepresentation of the resident  
394 species (see also Fig S12).

395 The study revealing autotransduction focused on the process of gene acquisition by the invaders  
396 and did not address the possibility of co-existence [27]. We thus experimentally addressed the

397 prediction of co-existence by co-culturing in liquid media supplemented with chloroamphenicol two  
398 strains of *Staphylococcus aureus*: a lysogenic strain (JH944, “invaders”) sensitive to the antibiotic  
399 and a non-lysogenic strain (JH938, “residents”) resistant to the antibiotic (see Methods). The  
400 majority of the clones isolated at the end of the experiment are from the JH944 background, and  
401 these are now resistant to chloroamphenicol, indicating the acquisition of the resistance gene from  
402 the resident bacteria by autotransduction. However, in all 3 replicates a subpopulation of JH938  
403 was observed to coexist with the invader strain (Fig 7B), confirming our predictions.

404 Importantly, coexistence is strictly dependent on the generation of lysogenic variants of the  
405 resident bacteria, being suppressed when we performed simulations without the generation of  
406 new lysogens (Fig S13A-D). This is experimentally corroborated with the observed release of  
407 phage particles from the surviving resident clones at the end of the co-culture, when these are  
408 exposed to Mitomycin C (Fig 7B, see Methods). This confirms that lysogenization of the resident  
409 bacteria is the mechanism responsible for the coexistence between the two strains.

410 Our simulations further suggest that structured environments (Fig S12A) provide an additional  
411 region, for extremely high rates of transduction, where coexistence is prevalent (upper regions in  
412 Fig S12B-C). These high rates are biologically implausible for viable phages, but not for defective  
413 phages or for gene transfer agents [46]. Finally, extinctions of both strains were more frequent  
414 when the probability of adsorption was high and transduction was low, suggesting that an inducible  
415 phage that is highly infective but a poor transducer is more likely to lead to the collapse of both  
416 the invaders and the antibiotic resistant populations. The likelihood of double extinctions is higher  
417 in structured environments (Fig S12A, Fig S14 and Fig S15) or in the absence of lysogenization  
418 of the resident bacteria (Fig S13E-F and Fig S16). Our results suggest that ecological interactions  
419 between strains invading communities of susceptible bacteria can be very diverse, depending on  
420 the rates of infection, transduction, lysogenization and population structure.

421

422 **Fig 7. The combined role of probability of adsorption and generalized transduction for the autotransduction of an antibiotic**  
423 **resistance gene.** The simulation scenario is similar to Fig 6. **A)** The heatmap represents the likelihood of the outcome of the  
424 simulations in function of the two parameters. The color scale ranges from green (100% of the final population composed resident  
425 bacteria) to red (100% of the final population composed of invader bacteria), with yellow regions indicating cases where coexistence  
426 is the outcome more likely to occur in the timeframe of the simulations. 30 repeat simulations were performed for each combination of  
427 parameters, and their median value is used to construct the heatmap. When both populations went extinct, this was either ignored to  
428 compute the median (if it occurred in less than 50% of the cases), or was marked as grey (otherwise). **B)** Co-cultures of a lysogenic  
429 chloroamphenicol sensitive strain of *S. aureus* (JH944, “invaders”) and a non-lysogenic chloroamphenicol resistant strain (JH938,  
430 “residents”) indicate coexistence between the two strains at the end of the experiment. Y-axis shows the percentage of colonies with  
431 a given genotype (out of 127 in total). Boxplots and dots represent the data for 3 independent replicates of the experiment.

432

433

## 434 Conclusion

435 Individual-based modelling is providing novel ways to analyze and predict the behavior of microbial  
436 systems [39]. Our novel approach integrates multiple and different bacterial species, phages,  
437 environmental structures and ecological conditions to explore different aspects of bacteria-phage  
438 interactions: temporal changes in community composition (e.g., between lysogens and non-  
439 lysogenic bacteria), the concurrent effects of mechanisms of infection, lysogeny, and transduction,  
440 and their consequences for the genomic composition of each individual bacteria and phage. To  
441 the best of our knowledge, no other theoretical or computation model integrates these different  
442 scales of bacteria-phage interactions. This has allowed us to characterize and quantify key  
443 ecological components, such as structured environments, in the dynamics emerging from these  
444 interactions.

445 Nonetheless, models are grounded on simplifying assumptions to make biological systems more  
446 tractable. This facilitates pinpointing the relevance of certain mechanisms or agents, but may  
447 result in misleading over-simplifications of the system. One major difference between biological  
448 systems and our model concerns the number of cells which, due to computational reasons, is  
449 lower than the one typically used in experimental settings. Even though our results are qualitatively  
450 similar to experimental and/or other theoretical works, this difference may affect the quantitative  
451 results. The decreased effective population size (and the consequent increase in the effect of drift)  
452 requires that certain rates (e.g., mutation or transduction rates) are simulated at higher values, in  
453 order to increase the probability of detecting such events. Another limitation lies in the  
454 characterization of the environment. Even if we allow for different levels of structure, environments  
455 are spatially and temporally constant throughout the simulations, which might not always be the  
456 case in nature. This can change the dynamics of propagation of phages, and lead to  
457 subpopulations specialized for different spatial niches. A third limitation of the model lies on the

458 lack of a true physiological description of the bacteria. We assume that phages can infect bacteria  
459 at any time, but phage infectivity is known, in some cases, to depend on whether its bacterial host  
460 is in exponential or stationary phase [47]. In other cases, a stochastic or induced persistence state  
461 in bacteria allows the population to maintain alive a sensitive subpopulation [48]. This can lead to  
462 a slowdown or complete halt of infection, particularly in structured environments. Nevertheless, it  
463 is important to underline that the model was designed to be easily extensible and further assimilate  
464 new mechanisms. Some that are already implemented but not thoroughly explored here include  
465 phage resistance based on adaptive immunity (e.g., CRISPR-Cas [32,49]) or mutations affecting  
466 the phage host range [50].

467 One of the major conclusions of this work is that spatial structure affects the dynamics of bacterial  
468 populations in the face of antibiotic exposure, phage predation or a combination of both. Whilst  
469 combining phages and antibiotics is one of the proposed strategies for the clinical use of phage  
470 [51,52], we show here that the emergence of bacteria resistant to both stressors can be enhanced  
471 by structured environments, particularly when antibiotics are not homogeneously distributed, as  
472 seems common in natural settings [53,54].

473 Adaptation of bacterial cells can also be driven by temperate phage, and we explore in detail how  
474 autotransduction can promote the spread of antibiotic resistance, quantifying the relative  
475 importance of different mechanisms for this outcome. Importantly, we predict that different  
476 community outcomes (coexistence and extinction) can occur by modulating the efficiency of  
477 phages' infection, lysogeny and transduction, as well as the structure of the environment. We  
478 experimentally confirm the emergence of co-existence between strains of *S. aureus* in well mixed  
479 environments, but it would be interesting in the future to modulate the efficiency of phage infection  
480 and of generating transducing particles. Furthermore, experimentally assessing the predicted role  
481 of structured environments in generating different conditions for co-existence and extinction will  
482 be important. It would also be crucial to explore how co-existence between virulent phage and

483 prophage influences the outcomes of a combined treatment with phage and antibiotics. Exploring  
484 these and other ecological settings is key to understand which factors impact the efficiency of  
485 phage therapy, and their evolutionary consequences for bacterial populations.

486

## 487 ACKNOWLEDGEMENTS

488 We thank Marie Touchon and José Pénadés for comments, suggestions, and criticisms during the  
489 development and testing of the model. This work was funded by European Research Council grant  
490 [EVOMOBILOME n°281605] to E.P.C.R. and by an EU FP7 PRESTIGE grant [PRESTIGE-2017-  
491 1-0012] from Campus France to J.A.M.S.

492

## 493 REFERENCES

- 494 1. Didelot X, Walker AS, Peto TE, Crook DW, Wilson DJ. Within-host evolution of bacterial  
495 pathogens. *Nat Rev Micro.*; 2016;14: 150–162. doi:10.1038/nrmicro.2015.13
- 496 2. Brooks AW, Kohl KD, Brucker RM, van Opstal EJ, Bordenstein SR. Phyllosymbiosis:  
497 Relationships and Functional Effects of Microbial Communities across Host Evolutionary  
498 History. Relman D, editor. *PLoS Biol.*; 2016;14: e2000225–29.  
499 doi:10.1371/journal.pbio.2000225
- 500 3. Fuhrman JA. Marine viruses and their biogeochemical and ecological effects. *Nature.*;  
501 1999;399: 541–548. doi:10.1038/21119
- 502 4. Koskella B, Brockhurst MA. Bacteria-phage coevolution as a driver of ecological and  
503 evolutionary processes in microbial communities. *FEMS Microbiol Rev.* 2014;38: 916–  
504 931. doi:10.1111/1574-6976.12072
- 505 5. Perfeito L, Fernandes L, Mota C, Gordo I. Adaptive mutations in bacteria: high rate and  
506 small effects. *Science. American Association for the Advancement of Science*; 2007;317:  
507 813–815. doi:10.1126/science.1142284
- 508 6. Ghoul M, Mitri S. The Ecology and Evolution of Microbial Competition. *Trends in*  
509 *Microbiology.* 2016;24: 833–845. doi:10.1016/j.tim.2016.06.011
- 510 7. Engelhardt T, Kallmeyer J, Cypionka H, Engelen B. High virus-to-cell ratios indicate  
511 ongoing production of viruses in deep subsurface sediments. *ISME J.*; 2014;8: 1503–

- 512 1509. doi:10.1038/ismej.2013.245
- 513 8. Díaz-Muñoz SL, Koskella B. Bacteria-phage interactions in natural environments. *Adv*  
514 *Appl Microbiol.* Elsevier; 2014;89: 135–183. doi:10.1016/B978-0-12-800259-9.00004-4
- 515 9. Clokie MR, Millard AD, Letarov AV, Heaphy S. Phages in nature. *Bacteriophage.* Taylor &  
516 Francis; 2011;1: 31–45. doi:10.4161/bact.1.1.14942
- 517 10. Suttle CA. Marine viruses--major players in the global ecosystem. *Nat Rev Micro.*; 2007;5:  
518 801–812. doi:10.1038/nrmicro1750
- 519 11. Roach DR, Debarbieux L. Phage therapy: awakening a sleeping giant. *Emerg Top Life*  
520 *Sci.* Portland Press Journals portal; 2017;1: 93–103. doi:10.1042/ETLS20170002
- 521 12. Susskind MM, Botstein D, Wright A. Superinfection exclusion by P22 prophage in  
522 lysogens of *Salmonella typhimurium*. III. Failure of superinfecting phage DNA to enter  
523 *sieA+* lysogens. *Virology.* 1974;62: 350–366.
- 524 13. Harrison E, Brockhurst MA. Ecological and Evolutionary Benefits of Temperate Phage:  
525 What Does or Doesn't Kill You Makes You Stronger. *Bioessays.* 2nd ed. 2017;197:  
526 1700112. doi:10.1002/bies.201700112
- 527 14. Bondy-Denomy J, Qian J, Westra ER, Buckling A, Guttman DS, Davidson AR, et al.  
528 Prophages mediate defense against phage infection through diverse mechanisms. *ISME*  
529 *J.*; 2016;10: 2854–2866. doi:10.1038/ismej.2016.79
- 530 15. Touchon M, Bernheim A, Rocha EP. Genetic and life-history traits associated with the  
531 distribution of prophages in bacteria. *ISME J.*; 2016. doi:10.1038/ismej.2016.47
- 532 16. Brüssow H, Canchaya C, Hardt W-D. Phages and the evolution of bacterial pathogens:  
533 from genomic rearrangements to lysogenic conversion. *Microbiology and Molecular*  
534 *Biology Reviews.* American Society for Microbiology; 2004;68: 560–602– table of  
535 contents. doi:10.1128/MMBR.68.3.560-602.2004
- 536 17. Bossi L, Fuentes JA, Mora G, Figueroa-Bossi N. Prophage contribution to bacterial  
537 population dynamics. *Journal of Bacteriology.* American Society for Microbiology (ASM);  
538 2003;185: 6467–6471. doi:10.1128/JB.185.21.6467-6471.2003
- 539 18. Gama JA, Reis AM, Domingues I, Mendes-Soares H, Matos AM, Dionisio F. Temperate  
540 bacterial viruses as double-edged swords in bacterial warfare. Brown SP, editor. *PLoS*  
541 *ONE.* 2013;8: e59043. doi:10.1371/journal.pone.0059043
- 542 19. Touchon M, Moura de Sousa JA, Rocha EP. Embracing the enemy: the diversification of  
543 microbial gene repertoires by phage-mediated horizontal gene transfer. *Current Opinion*  
544 *in Microbiology.* 2017;38: 66–73. doi:10.1016/j.mib.2017.04.010
- 545 20. Weinstock GM. Transduction in Gram-Negative Bacteria. *Modern Microbial Genetics.*  
546 New York, USA: John Wiley & Sons, Inc; 2002. pp. 561–579.  
547 doi:10.1002/047122197X.ch21
- 548 21. Henry M, Debarbieux L. Tools from viruses: bacteriophage successes and beyond.

- 549 Virology. 2012;434: 151–161. doi:10.1016/j.virol.2012.09.017
- 550 22. Kenzaka T, Tani K, Sakotani A, Yamaguchi N, Nasu M. High-frequency phage-mediated  
551 gene transfer among *Escherichia coli* cells, determined at the single-cell level. *Appl*  
552 *Environ Microbiol.* 2007;73: 3291–3299. doi:10.1128/AEM.02890-06
- 553 23. Kenzaka T, Tani K, Nasu M. High-frequency phage-mediated gene transfer in freshwater  
554 environments determined at single-cell level. *ISME J.*; 2010;4: 648–659.  
555 doi:10.1038/ismej.2009.145
- 556 24. Xia G, Wolz C. Phages of *Staphylococcus aureus* and their impact on host evolution.  
557 *Infect Genet Evol.* 2014;21: 593–601. doi:10.1016/j.meegid.2013.04.022
- 558 25. Balcazar JL. Bacteriophages as Vehicles for Antibiotic Resistance Genes in the  
559 Environment. Miller V, editor. *PLoS Pathog.* 2014;10: e1004219–4.  
560 doi:10.1371/journal.ppat.1004219
- 561 26. Haaber J, Penadés JR, Ingmer H. Transfer of Antibiotic Resistance in *Staphylococcus*  
562 *aureus*. *Trends in Microbiology.* Elsevier Ltd; 2017;25: 1–13.  
563 doi:10.1016/j.tim.2017.05.011
- 564 27. Haaber J, Leisner JORJ, Cohn MT, Catalan-Moreno A, Nielsen JB, Westh H, et al.  
565 Bacterial viruses enable their host to acquire antibiotic resistance genes from  
566 neighbouring cells. *Nature Communications.*; 2016;7: 1–8. doi:10.1038/ncomms13333
- 567 28. Bull JJ, Gill JJ. The habits of highly effective phages: population dynamics as a  
568 framework for identifying therapeutic phages. *Front Microbiol.* *Frontiers*; 2014;5: 1–12.  
569 doi:10.3389/fmicb.2014.00618
- 570 29. De Paepe M, Tournier L, Moncaut E, Son O, Langella P, Petit M-A. Carriage of  $\lambda$  Latent  
571 Virus Is Costly for Its Bacterial Host due to Frequent Reactivation in Monoxenic Mouse  
572 Intestine. Hughes D, editor. *PLoS Genet.* 2016;12: e1005861.  
573 doi:10.1371/journal.pgen.1005861
- 574 30. Weitz JS, Hartman H, Levin SA. Coevolutionary arms races between bacteria and  
575 bacteriophage. *Proceedings of the National Academy of Sciences.* 2005;102: 9535–9540.  
576 doi:10.1073/pnas.0504062102
- 577 31. Berngruber TW, Lion S, Gandon S. Evolution of suicide as a defence strategy against  
578 pathogens in a spatially structured environment. Thrall P, editor. *Ecology Letters.*  
579 2013;16: 446–453. doi:10.1111/ele.12064
- 580 32. Koonin EV, Wolf YI. Evolution of the CRISPR-Cas adaptive immunity systems in  
581 prokaryotes: models and observations on virus–host coevolution. *Molecular*  
582 *BioSystems.* Royal Society of Chemistry; 2014;11: 20–27. doi:10.1039/C4MB00438H
- 583 33. Levin BR, Bull JJ. Population and evolutionary dynamics of phage therapy. *Nat Rev*  
584 *Micro.* Nature Publishing Group; 2004;2: 166–173. doi:10.1038/nrmicro822
- 585 34. McVay CS, Velásquez M, Fralick JA. Phage therapy of *Pseudomonas aeruginosa*  
586 infection in a mouse burn wound model. *Antimicrobial Agents and Chemotherapy.*



- 587 2007;51: 1934–1938. doi:10.1128/AAC.01028-06
- 588 35. Brockhurst MA, Buckling A, Rainey PB. Spatial heterogeneity and the stability of host-  
589 parasite coexistence. *J Evol Biol.* Blackwell Publishing Ltd; 2006;19: 374–379.  
590 doi:10.1111/j.1420-9101.2005.01026.x
- 591 36. Simmons M, Drescher K, Nadell CD, Bucci V. Phage mobility is a core determinant of  
592 phage-bacteria coexistence in biofilms. *ISME J.*; 2017;89: 135.  
593 doi:10.1038/ismej.2017.190
- 594 37. Roach DR, Leung CY, Henry M, Morello E, Singh D, Di Santo JP, et al. Synergy between  
595 the Host Immune System and Bacteriophage Is Essential for Successful Phage Therapy  
596 against an Acute Respiratory Pathogen. *Cell Host and Microbe.* 2017;22: 38–47.e4.  
597 doi:10.1016/j.chom.2017.06.018
- 598 38. Volkova VV, Lu Z, Besser T, Gröhn YT. Modeling the infection dynamics of  
599 bacteriophages in enteric *Escherichia coli*: estimating the contribution of transduction to  
600 antimicrobial gene spread. *Appl Environ Microbiol.* 2014;80: 4350–4362.  
601 doi:10.1128/AEM.00446-14
- 602 39. Hellweger FL, Clegg RJ, Clark JR, Plugge CM, Kreft J-U. Advancing microbial sciences  
603 by individual-based modelling. *Nat Rev Micro.*; 2016;14: 461–471.  
604 doi:10.1038/nrmicro.2016.62
- 605 40. Grimm V, Berger U, Bastiansen F, Eliassen S, Ginot V, Giske J, et al. A standard protocol  
606 for describing individual-based and agent-based models. *Ecological Modelling.* 2006;198:  
607 115–126. doi:10.1016/j.ecolmodel.2006.04.023
- 608 41. Andersson DI, Levin BR. The biological cost of antibiotic resistance. *Current Opinion in*  
609 *Microbiology.* 1999;2: 489–493.
- 610 42. Samson JE, Magadán AH, Sabri M, Moineau S. Revenge of the phages: defeating  
611 bacterial defences. *Nat Rev Micro.*; 2013;11: 1–13. doi:10.1038/nrmicro3096
- 612 43. Gómez P, Ashby B, Buckling A. Population mixing promotes arms race host-parasite  
613 coevolution. *Proc Biol Sci.* 2015;282: 20142297–20142297. doi:10.1098/rspb.2014.2297
- 614 44. Zeng L, Skinner SO, Zong C, Sippy J, Feiss M, Golding I. Decision making at a  
615 subcellular level determines the outcome of bacteriophage infection. *Cell.* 2010;141: 682–  
616 691. doi:10.1016/j.cell.2010.03.034
- 617 45. Brown SP, Le Chat L, De Paepe M, Taddei F. Ecology of microbial invasions:  
618 amplification allows virus carriers to invade more rapidly when rare. *Current Biology.*  
619 2006;16: 2048–2052. doi:10.1016/j.cub.2006.08.089
- 620 46. Lang AS, Westbye AB, Beatty JT. The Distribution, Evolution, and Roles of Gene Transfer  
621 Agents in Prokaryotic Genetic Exchange. *Annu Rev Virol.* 2017;4: 87–104.  
622 doi:10.1146/annurev-virology-101416-041624
- 623 47. Chibani-Chennoufi S, Bruttin A, Dillmann M-L, Brüßow H. Phage-host interaction: an  
624 ecological perspective. *Journal of Bacteriology.* American Society for Microbiology;

- 625 2004;186: 3677–3686. doi:10.1128/JB.186.12.3677-3686.2004
- 626 48. Chapman-McQuiston E, Wu XL. Stochastic receptor expression allows sensitive bacteria  
627 to evade phage attack. Part I: experiments. *Biophys J.* 2008;94: 4525–4536.  
628 doi:10.1529/biophysj.107.120212
- 629 49. Bradde S, Vucelja M, Teşileanu T, Balasubramanian V. Dynamics of adaptive immunity  
630 against phage in bacterial populations. Komarova NL, editor. *PLoS Comput Biol.* 2017;13:  
631 e1005486–16. doi:10.1371/journal.pcbi.1005486
- 632 50. De Sordi L, Khanna V, Debarbieux L. The Gut Microbiota Facilitates Drifts in the Genetic  
633 Diversity and Infectivity of Bacterial Viruses. *Cell Host and Microbe.* 2017;22: 801–808.e3.  
634 doi:10.1016/j.chom.2017.10.010
- 635 51. Torres-Barceló C, Hochberg ME. Evolutionary Rationale for Phages as Complements of  
636 Antibiotics. *Trends in Microbiology.* Elsevier Ltd; 2016;24: 249–256.  
637 doi:10.1016/j.tim.2015.12.011
- 638 52. Arias-Sánchez FI, Allen RC, Hall AR. Effects of prior exposure to antibiotics on bacterial  
639 adaptation to phages. *J Evol Biol.* 2018;11: 2970–10. doi:10.1111/jeb.13220
- 640 53. Anderl JN, Franklin MJ, Stewart PS. Role of antibiotic penetration limitation in *Klebsiella*  
641 *pneumoniae* biofilm resistance to ampicillin and ciprofloxacin. *Antimicrobial Agents and*  
642 *Chemotherapy.* American Society for Microbiology (ASM); 2000;44: 1818–1824.
- 643 54. Pratama AA, van Elsas JD. The “Neglected” Soil Virome – Potential Role and Impact.  
644 *Trends in Microbiology.* Elsevier Ltd; 2018;: 1–14. doi:10.1016/j.tim.2017.12.004
- 645

**Fig 1**

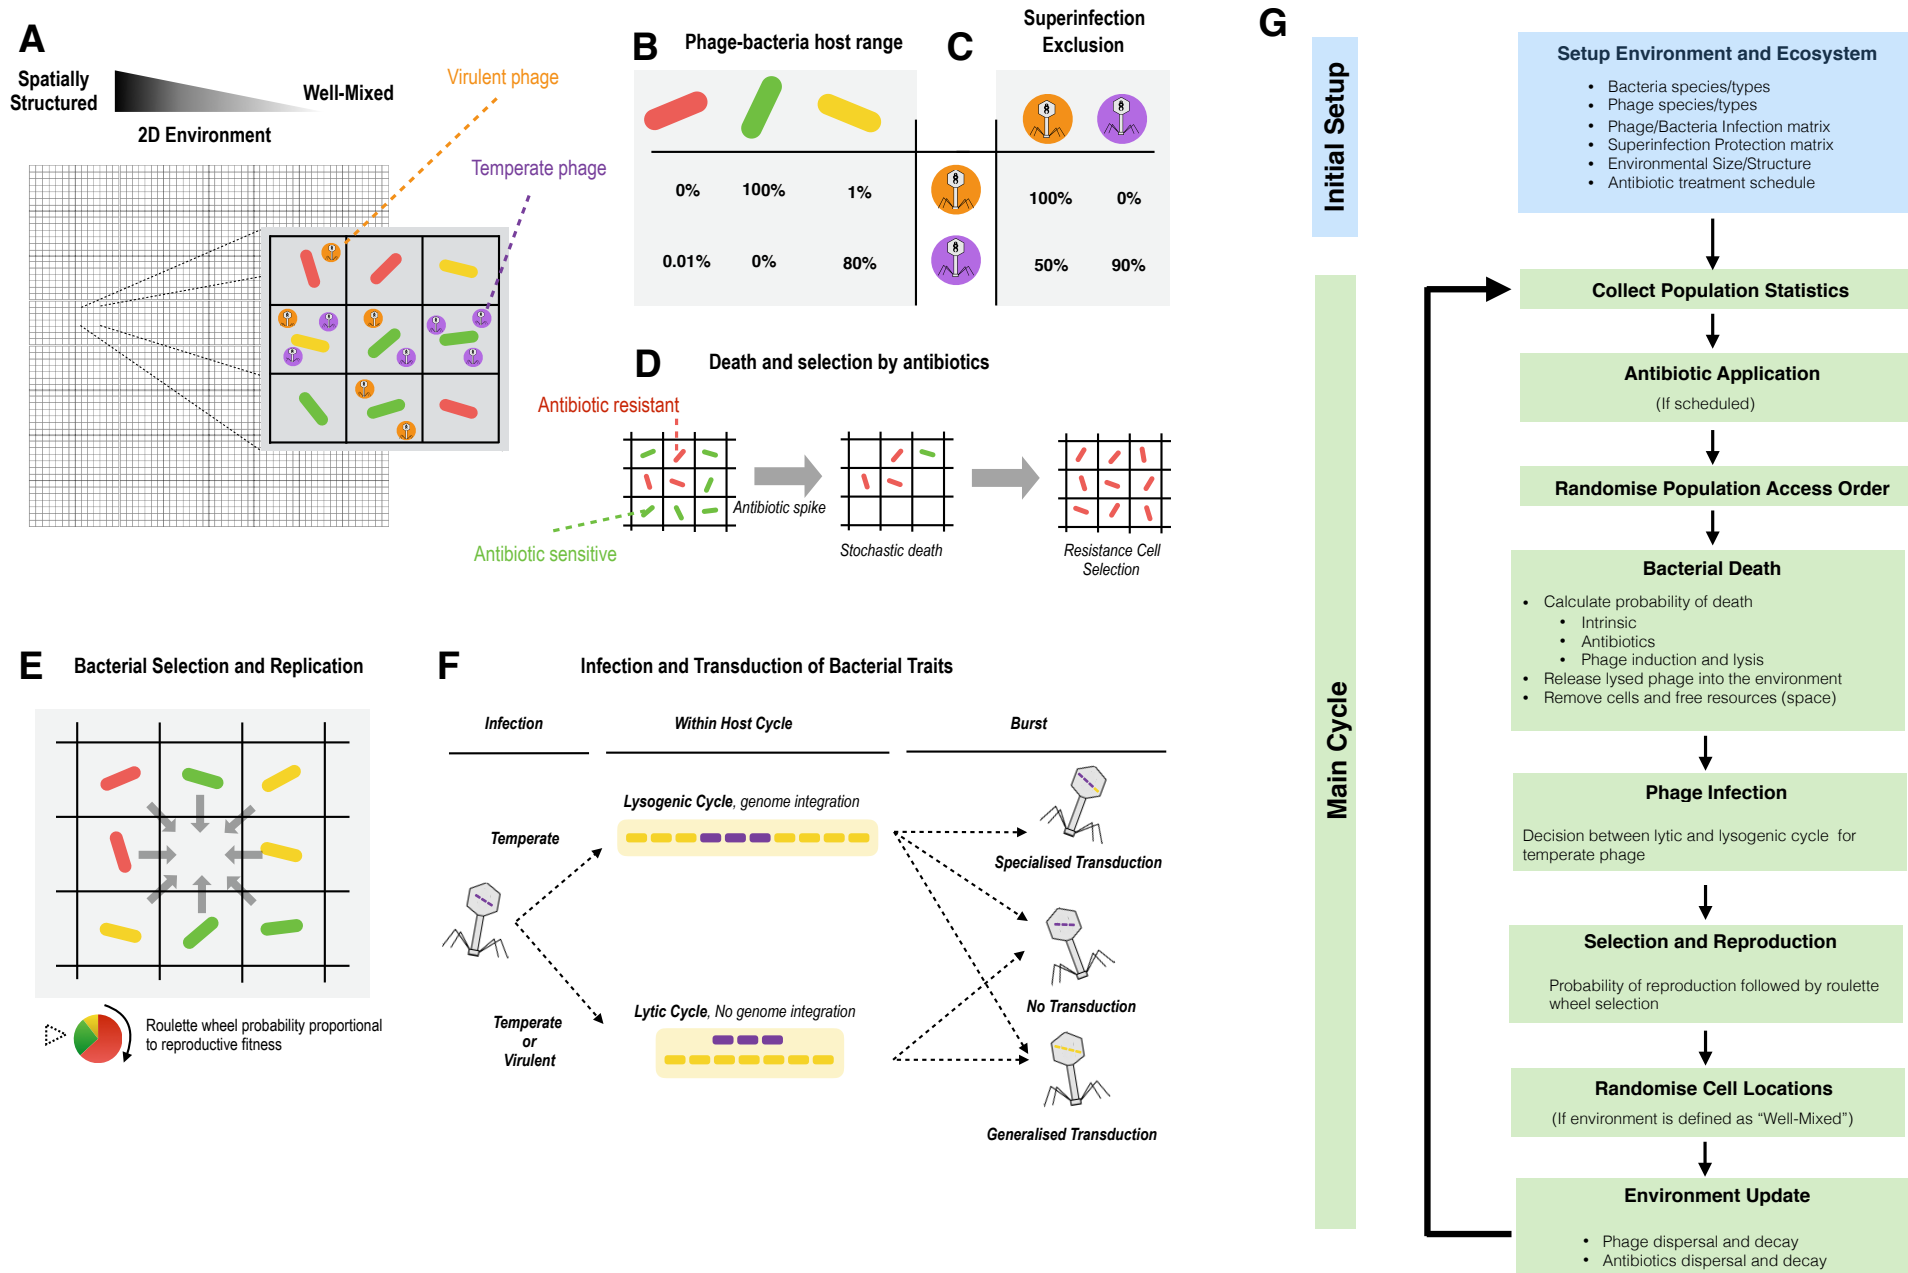

# Fig 2

## Well Mixed Environment

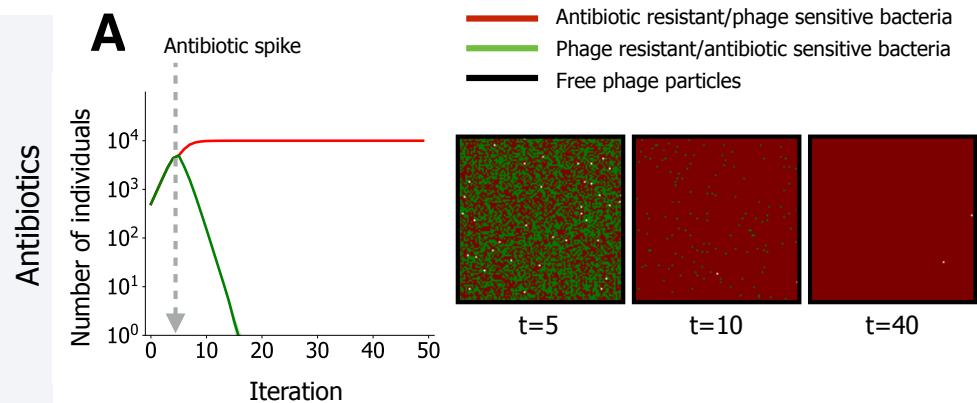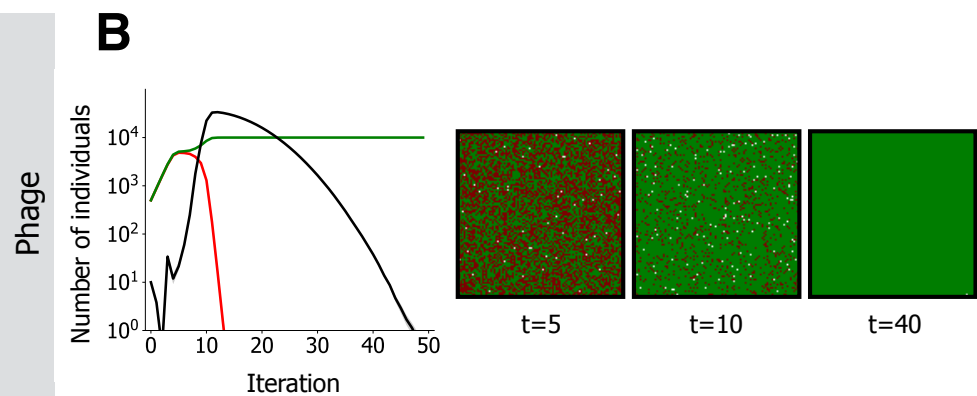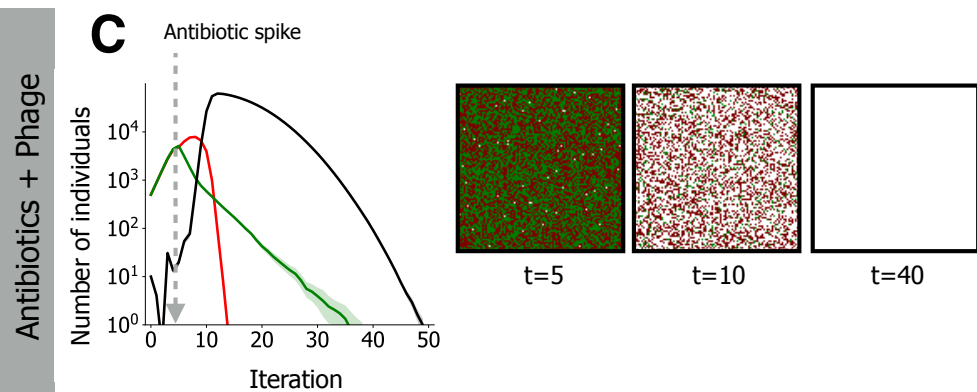

## Spatially Structured Environment

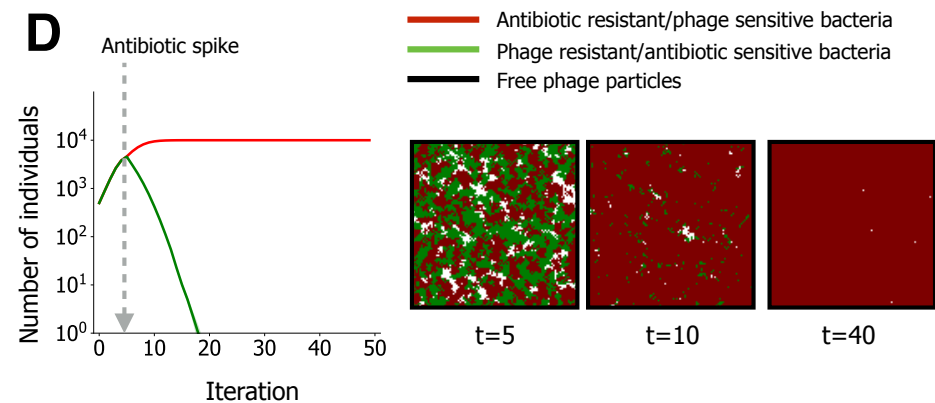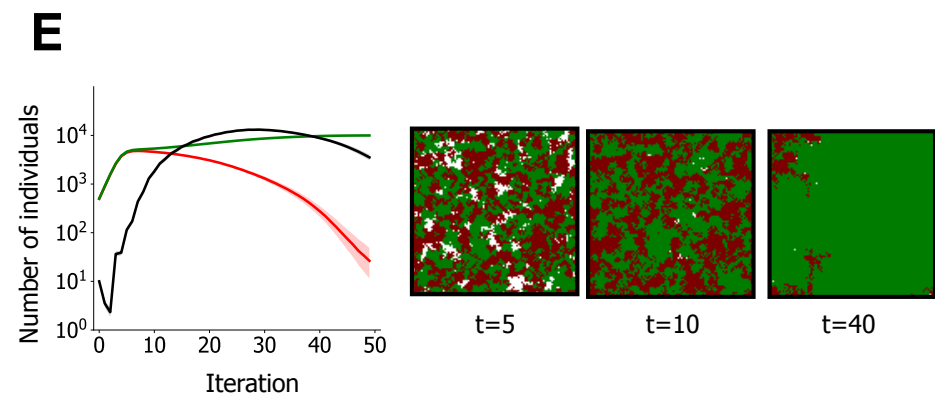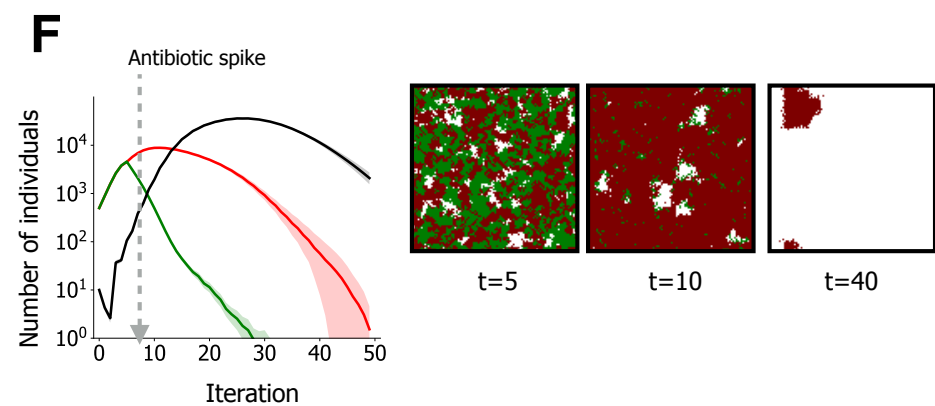

# Fig 3

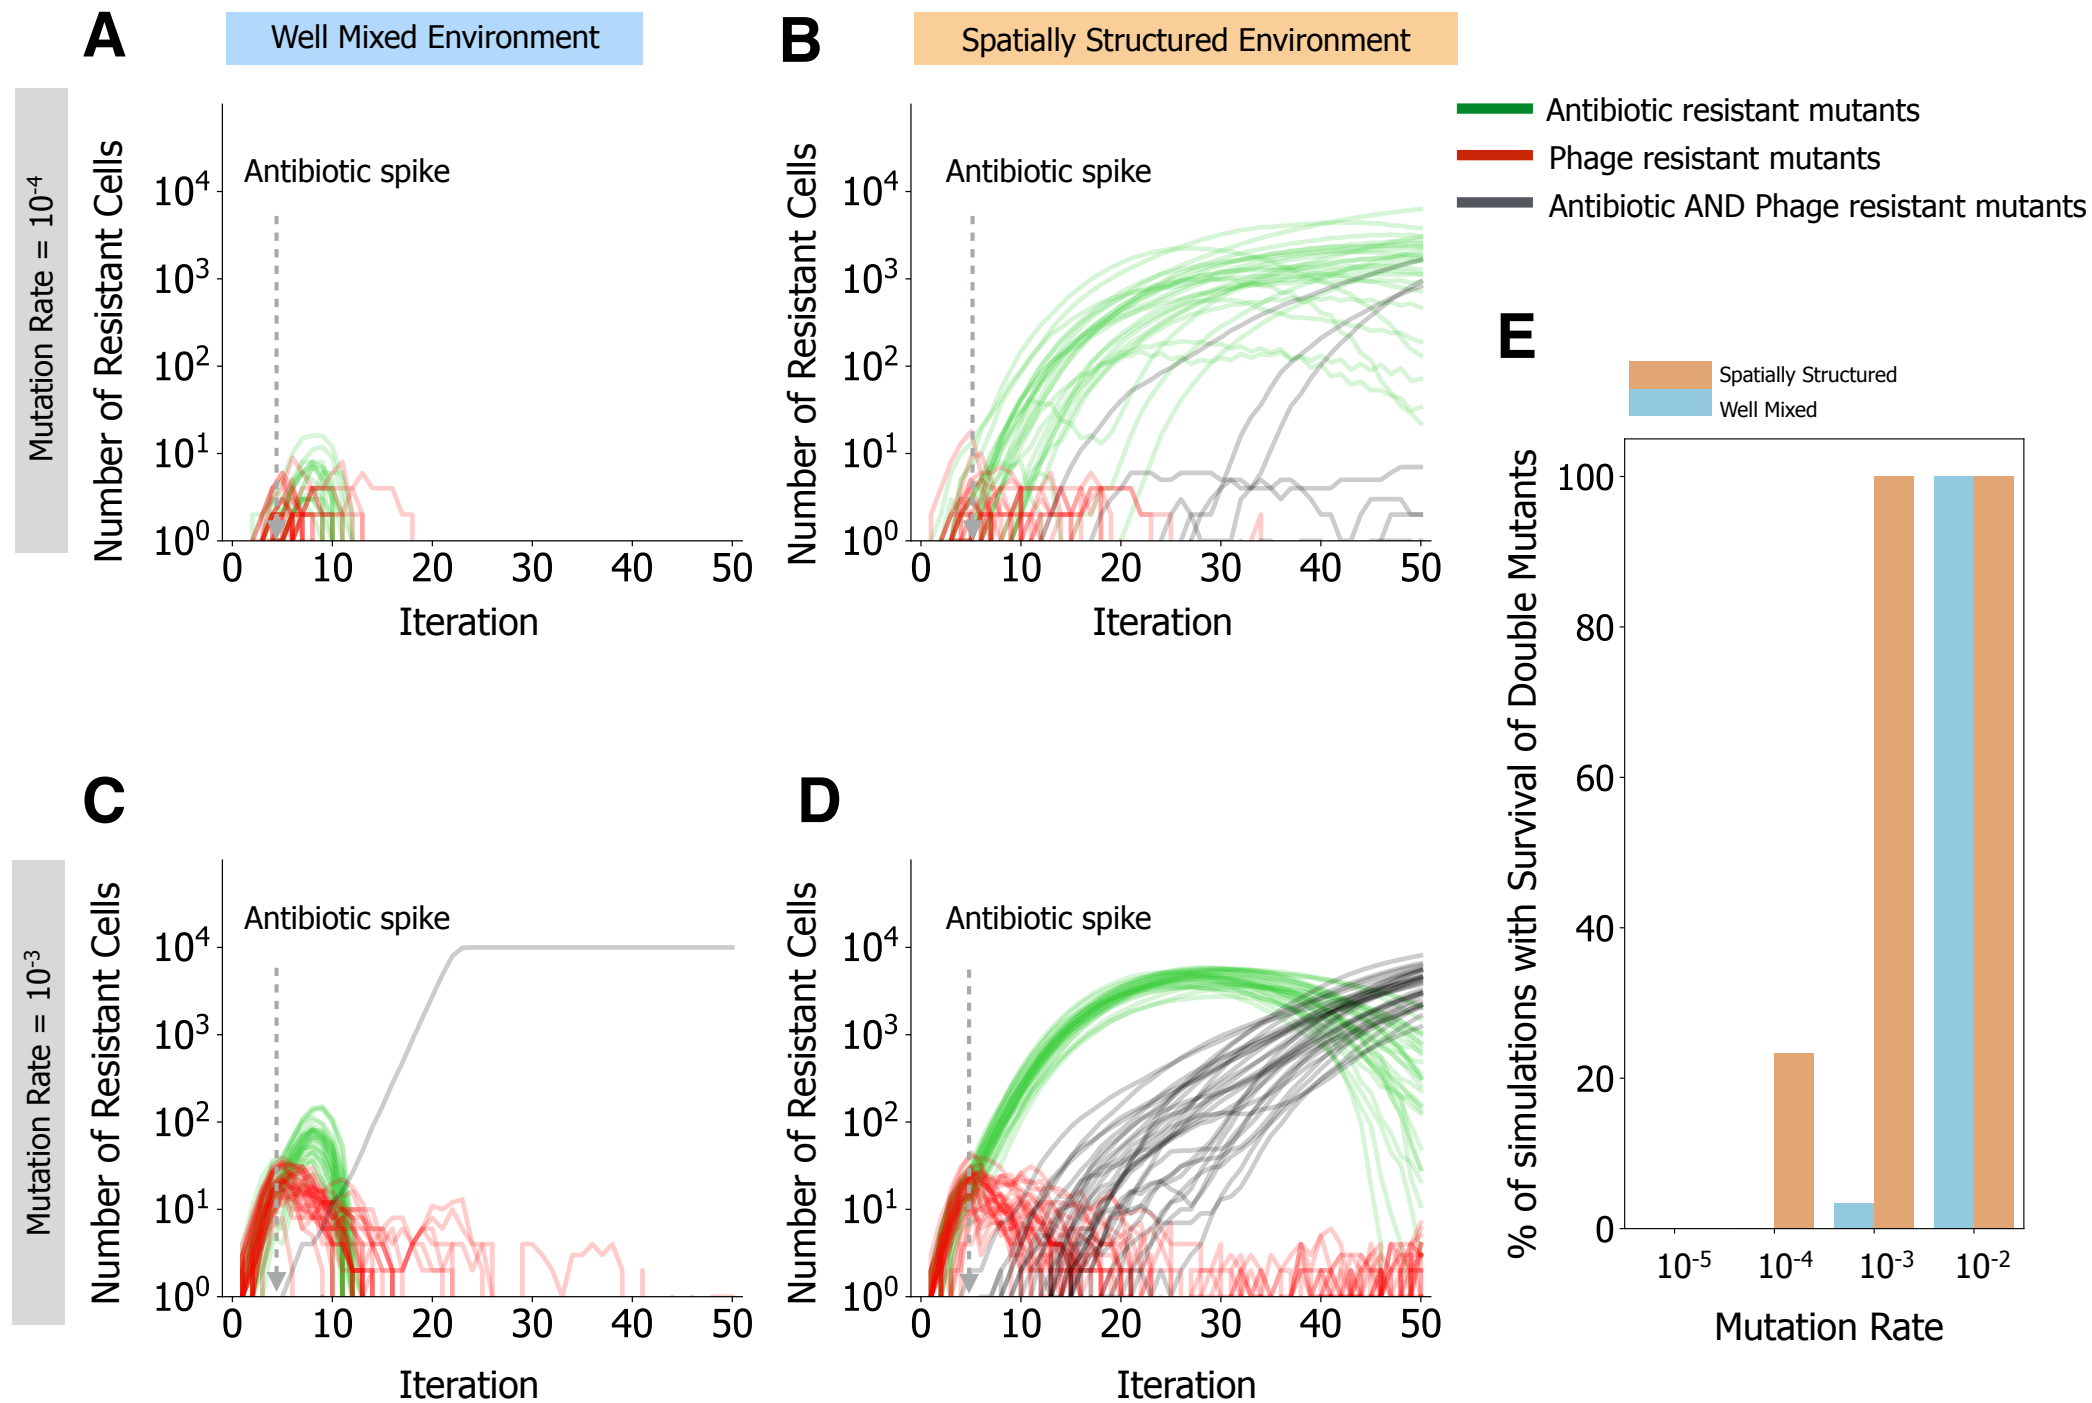

# Fig 4

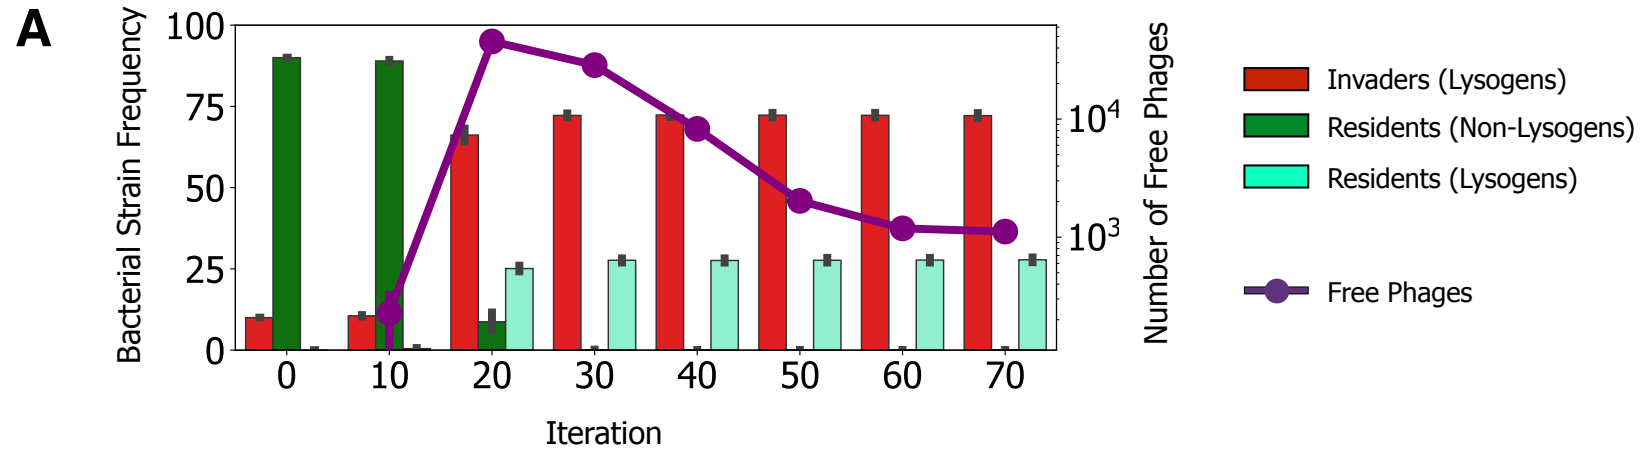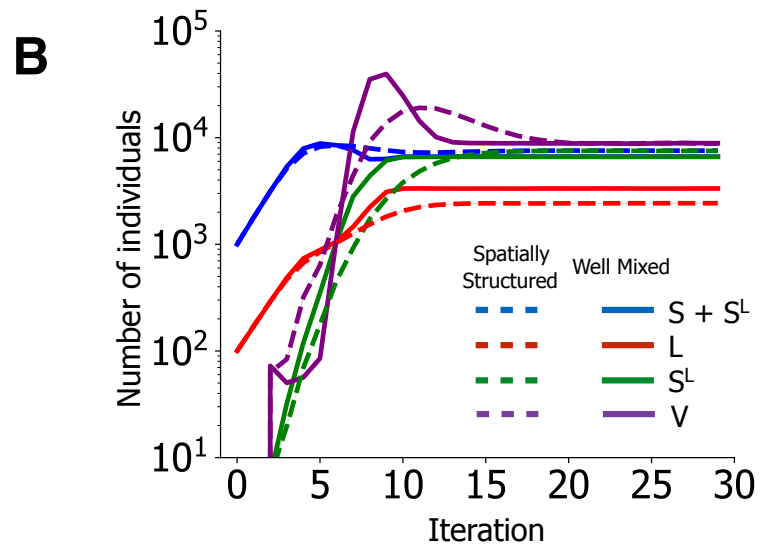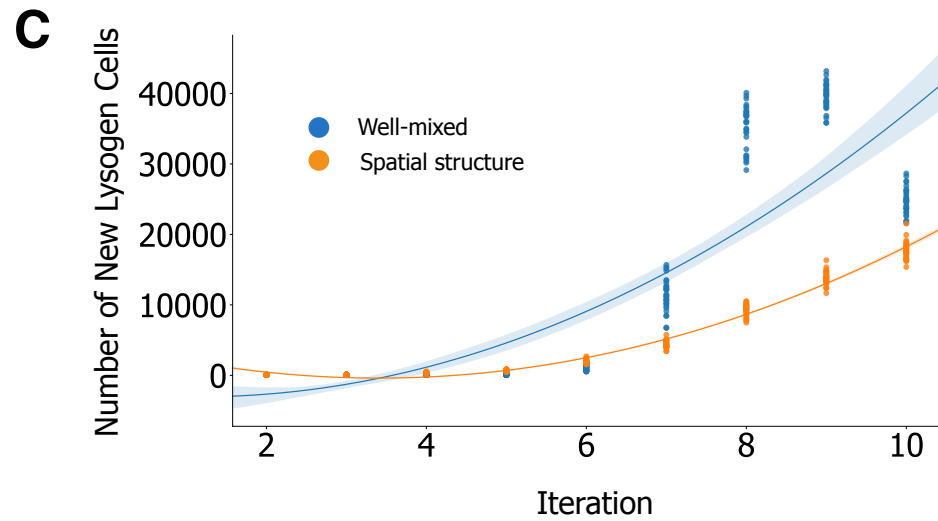

# Fig 5

## A

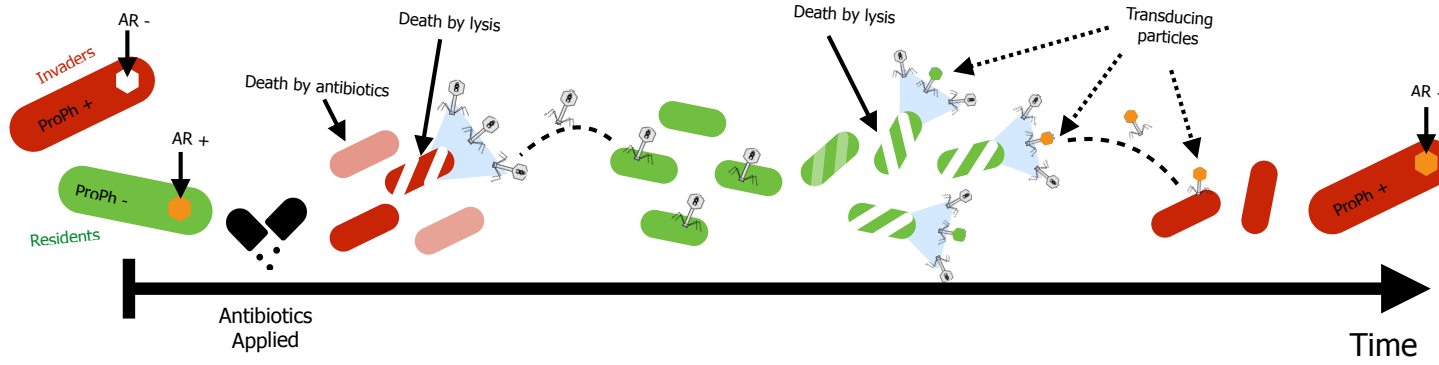

## B

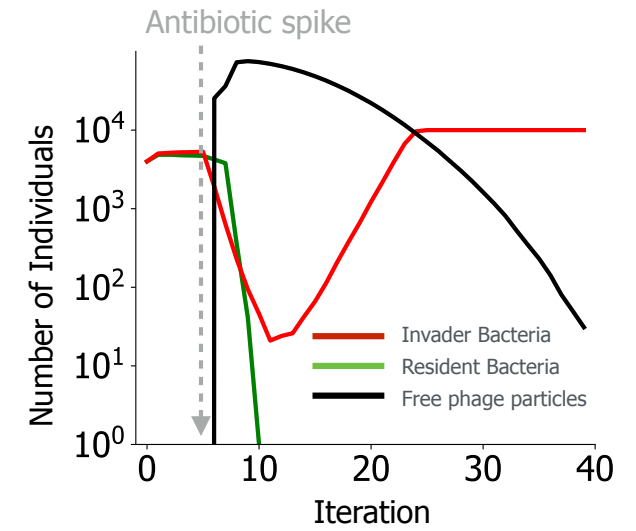

## C

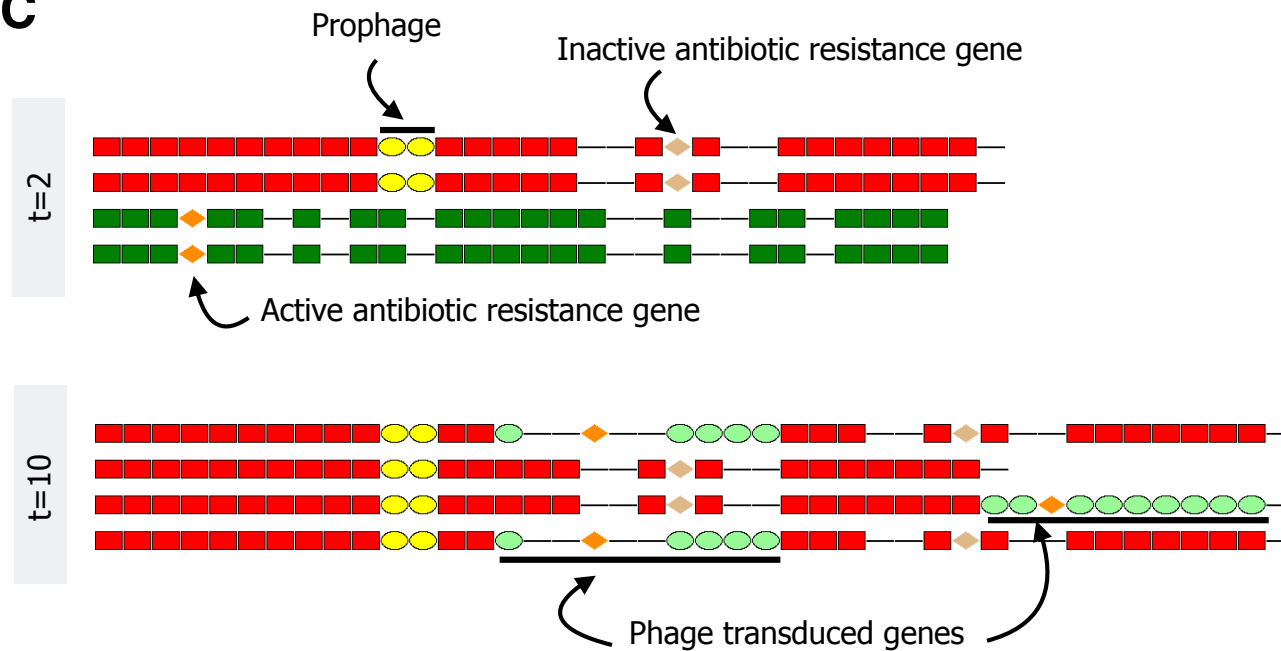

## D

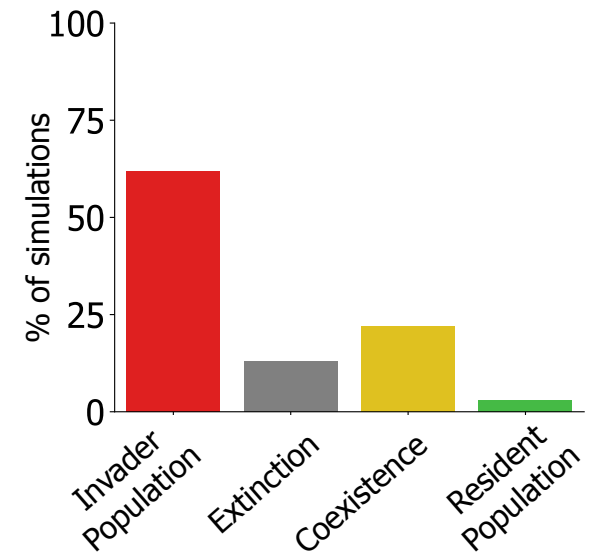

# Fig 6

## A

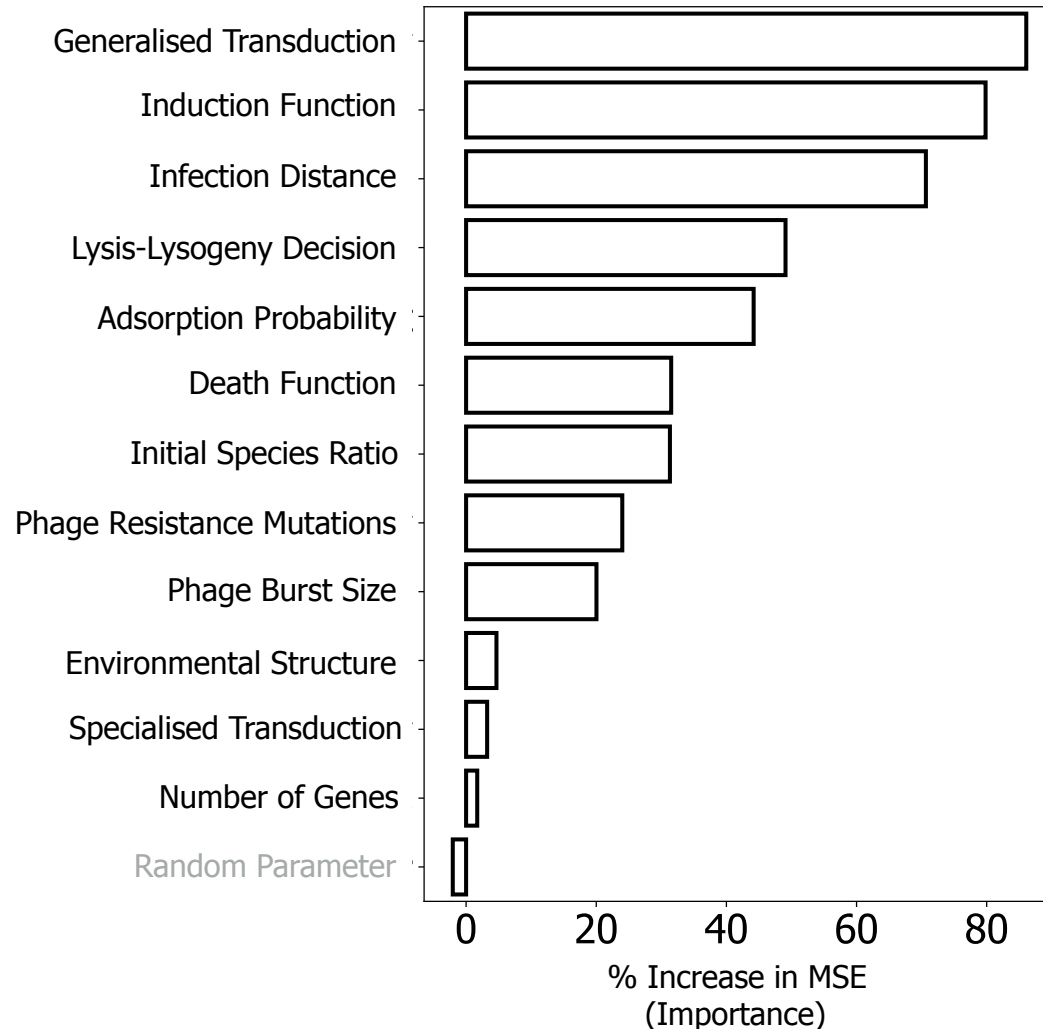

## B

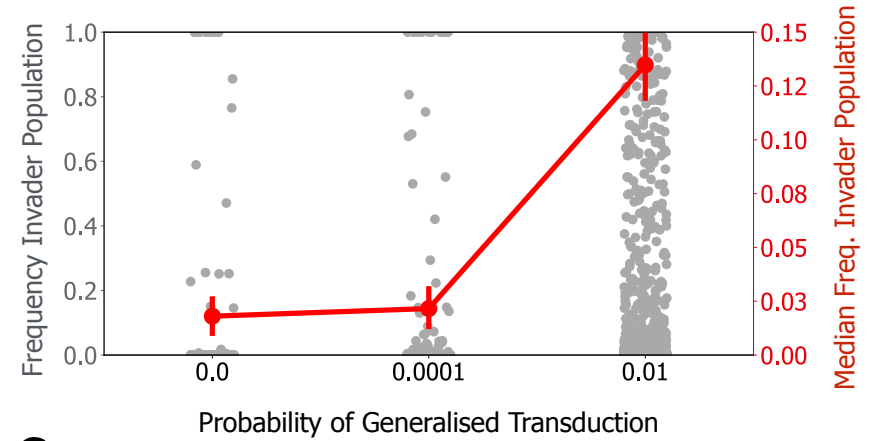

## C

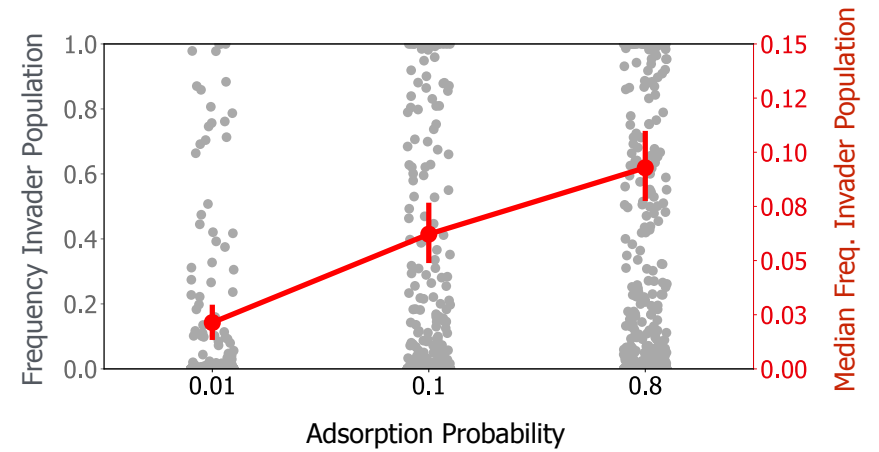



# Fig 7

## A

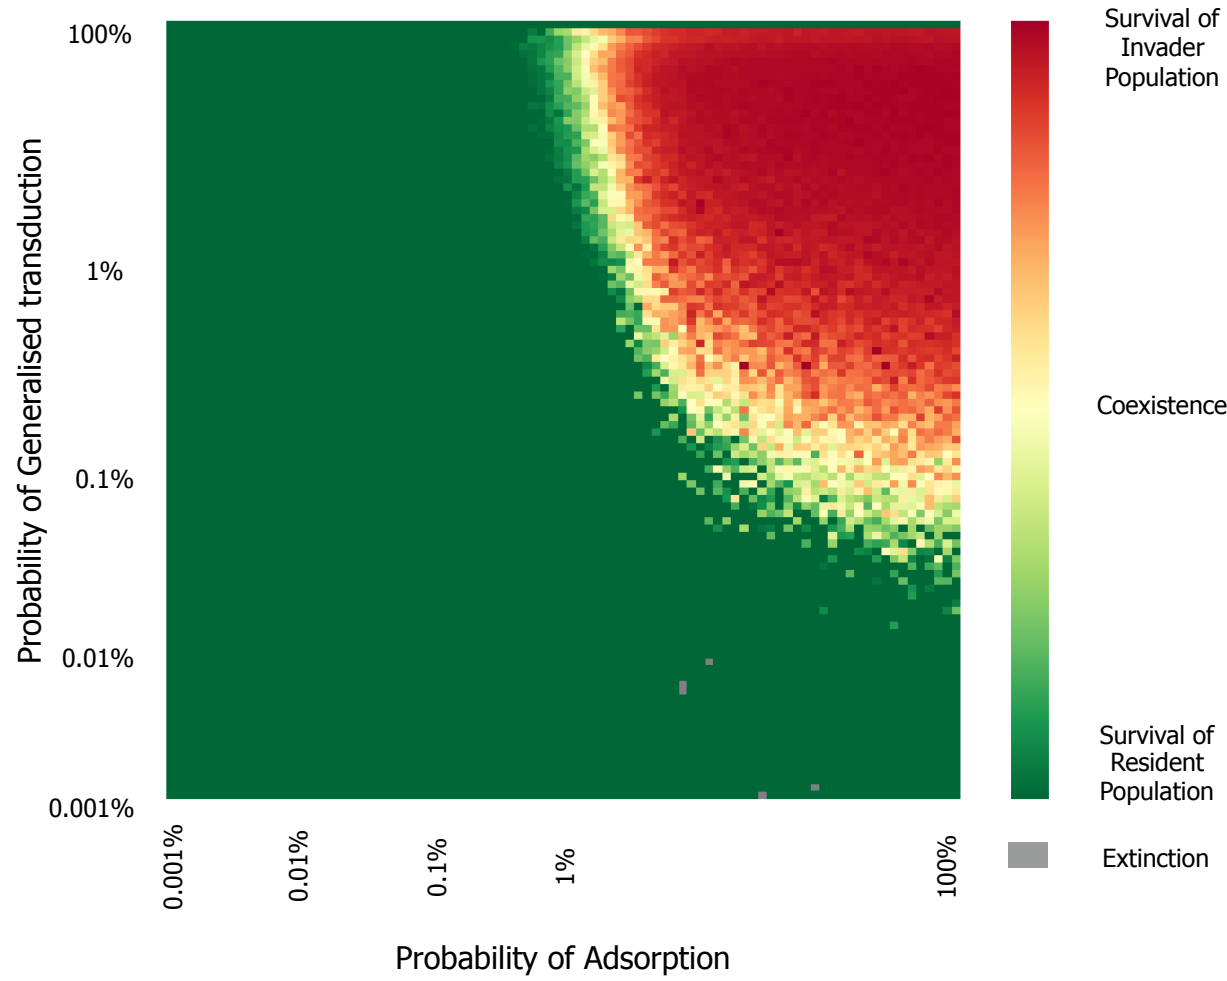

## B

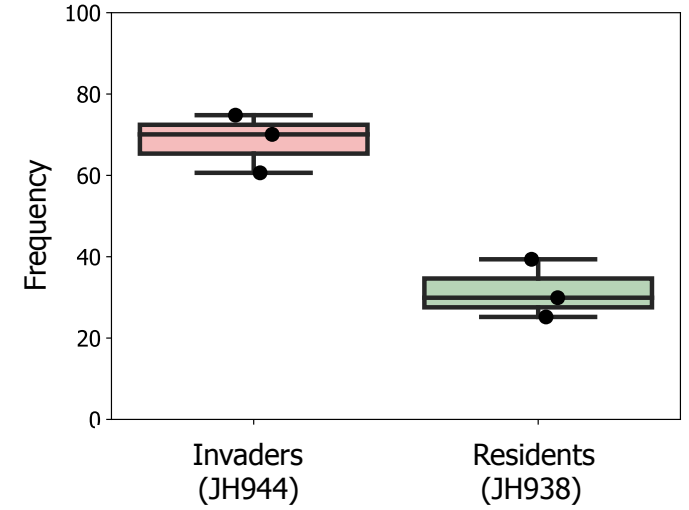

Source: https://www.biorxiv.org/content/10.1101/291328v1.full.pdf
